# Supplementary material for: Did self‐reported tobacco smoking, alcohol consumption, and physical activity change during the COVID-19 restrictions in Germany in spring 2020? Findings from a population survey (the DEBRA study)
Source: Research Square preprint supplement (doi:10.21203/rs.3.rs-479652/v1), 2021-05-12
Supplement: Supplementary file 1 [file c27d43519f9bb0bd4259e62a.docx]

**Supplementary Table I**: Preparatory analysis: Measure of correlation of both survey waves (unweighted data).

|  | | **Wave 24‖** | **Wave25‖** | **Chi-square test** |
| --- | --- | --- | --- | --- |
|  |  | | | |
| **Tobacco smoking** | | **100 % (n=620)** | **100 % (n=581)** | **1578 (df=4)** |
| *During the time of corona restrictions, I…* | |  |  |  |
| smoked much more than before | | 5.5 (34) | 4.3 (25) |  |
| smoked somewhat more than before | | 17.9 (111) | 16.9 (98) |  |
| smoked the same amount than before | | 66.3 (411) | 67.5 (392) | p=0.813 |
| smoked somewhat less than before | | 6.9 (43) | 7.2 (42) |  |
| smoked much less than before | | 3.4 (21) | 4.1 (24) |  |
|  | |  |  |  |
| **Alcohol consumption** | | **100 % (n=1494)** | **100 % (n=1537)** | **4.152 (df=4)** |
| *During the time of corona restrictions, I…* | |  |  |  |
| drank much more alcohol than before | | 1.5(22) | 1.3 (20) |  |
| drank somewhat more alcohol than before | | 10.5 (157) | 9.3 (143) |  |
| drank the same amount of alcohol than before | | 67.9 (1014) | 69.7 (1071) | p=0.386 |
| drank somewhat less alcohol than before | | 11.6 (173) | 12.6 (193) |  |
| drank much less alcohol than before | | 8.6 (128) | 7.2 (110) |  |
|  | |  |  |  |
| **Physical activity** | | **100 % (n=2010)** | **100 % (n=2005)** | **13.173 (df=4)** |
| *During the time of corona restrictions, I (was)…* | |  |  |  |
| much more active than before | | 5.3 (106) | 3.9 (78) |  |
| somewhat more active than before | | 13.0 (261) | 11.7 (235) |  |
| just as active as before | | 51.0 (1026) | 55.9 (1120) | p=0.010 |
| slightly less active than before | | 21.6 (434) | 21.0 (422) |  |
| much less active than before | | 9.1 (183) | 7.5 (150) |  |
|  | |  |  |  |

**‖**Differences in the total number of respondents can be explained by people who refused to answer or reported that they do not smoke, drink alcohol or cannot move
